# Supplementary material for: Integrated enzyme reactor and high resolving chromatography in “sub-chip” dimensions for sensitive protein mass spectrometry
Source: PubMed Central journal article supplement (PMC3863811; doi:10.1038/srep03511), 2013-12-16
Supplement: srep03511-s1.pdf [file srep03511-s1.pdf]

Integrated enzyme reactor and high resolving chromatography in “sub-chip” dimensions for  
sensitive protein mass spectrometry

Hanne Kolsrud Hustoft<sup>1,\*</sup>, Ole Kristian Brandtzaeg<sup>1</sup>, Magnus Rogeberg<sup>1,3</sup>, Dorna Misaghian<sup>1</sup>,  
Silje Bøen Torsetnes<sup>2</sup>, Tyge Greibrokk<sup>1</sup>, Léon Reubsaet<sup>2</sup>, Steven Ray Wilson<sup>1,\*</sup> and Elsa  
Lundanes<sup>1</sup>

<sup>1</sup>Department of Chemistry, University of Oslo, Post Box 1033 Blindern, NO-0315 Oslo, Norway,

<sup>2</sup>School of Pharmacy, University of Oslo, Post Box 1068 Blindern, NO-0316 Oslo, Norway,

<sup>3</sup>Department of Neurology, Akershus University Hospital, 1478 Lørenskog, Norway.

\*Address correspondence to: [h.k.hustoft@kjemi.uio.no](mailto:h.k.hustoft@kjemi.uio.no) and [stevenw@kjemi.uio.no](mailto:stevenw@kjemi.uio.no)

## Chemicals and materials

HPLC grade acetonitrile (ACN, VWR, West Chester, PA, USA), HPLC water (Chromasolv plus for HPLC, Sigma Aldrich, St. Louis, MO, USA), type 1 water from an ultrapure water purification system (Milipore Corporation, Billerica, MA, USA), formic acid (FA, 50 %, Fluka, by Sigma Aldrich), ammonium acetate (98 %, Sigma Aldrich), ammonia (28 %, VWR Fontenay-sous-Bois, France) were used to prepare the mobile phases. Myoglobin and lysozyme were reduced and alkylated prior to on-line digestion in the proteomic platform with Triethylammonium bicarbonate buffer (pH:  $8.5 \pm 0.1$ ) (tABC, Sigma-Aldrich), DL-Dithiothreitol, (DTT, Fluka, Sigma Aldrich), Iodacetamide (IAM, Sigma Aldrich). The proteins used were cytochrome C (bovine heart, 1 mg/mL, 11.7 kDa), lysozyme (chicken egg white, 1 mg/mL, 14.3 kDa), myoglobin (equine heart, 1 mg/mL, 17 kDa). The proteins were all obtained from Sigma-Aldrich. Recombinant ProGRP isoform 1 was obtained as described by Torsetnes *et al.*<sup>1</sup>. To prepare the stock solution of the protein, 1 mg of the solid protein was dissolved in 1 mL of water to a 1mg/mL concentration. For preparation of the columns the following were used: N,N-Dimethylformamide anhydrous (DMF), 3-(Trimethoxysilyl)propyl methacrylate ( $\gamma$ -MAPS, 98 %), divinylbenzene (DVB, 80 % mixture of isomers, styrene, 99 %), 1-dodecanol, sodium hydroxide (NaOH, 99 %), inhibitor 2,2-diphenyl-1-picrylhydrazyl hydrate (DPPH), ethylene dimethacrylate (EDMA, 98 %), 2-hydroxyethyl methacrylate (HEMA, 97 %, containing 200-220 ppm monomethyl ether hydroquinone as inhibitor) and initiator 2,2' azobis(2-methylpropionitrile) (AIBN), all purchased from Sigma Aldrich. Toluene was purchased from Rathburn Chemical Ltd. (Walkerburn, Scotland, UK). Trypsin from bovine pancreas ( $\geq 10,000$  BAEE), benzamidine (>95 %), ethanolamine (99 %), sodium phosphate monobasic (99 %), di sodium hydrogen phosphate (99 %) and 1-decanol (98 %) were all purchased from Sigma Aldrich. The Vinyl azlactone (VDM) was purchased from Polysciences, Inc. (Warrington, PA). Ethanol was purchased from Arcus (Oslo, Norway). Nitrogen gas (99.99 %) was obtained from AGA (Oslo, Norway). Polyimide coated fused silica tubing (360  $\mu$ m outer diameter (OD), 100, 75, 50, 20, 15, 10 and 5  $\mu$ m ID) were purchased from Polymicro Technologies (Phoenix, AZ).

## Methods

### Scanning Electron Microscope (SEM) procedure

A sample of dried capillary (about 1 cm) was cut off, placed on a carbon tape, and placed in a FEI Quanta 200 FEG-ESEM (FEI, Hillsboro, OR, USA). The low vacuum mode was initiated while taking the SEM images and a LFD detector was used.

## Tables

**Supplementary Table S1: Trypsin reactor repeatability.** Five reactors identically produced at different time points were able to perform on-line digestion and detect from  $\approx$  40.54-54.05% of the ProGRP aa sequence coverage (SQ), all digests including the signature peptide.

| Reactor | Digest | % SQ  | #Unique peptides |
|---------|--------|-------|------------------|
| 1       | ✓      | 54.05 | 6                |
| 2       | ✓      | 40.54 | 5                |
| 3       | ✓      | 40.54 | 5                |
| 4       | ✓      | 54.05 | 6                |
| 5       | ✓      | 40.54 | 4                |

**Supplementary Table S2: Repeatability of retention time (RT):** Three replicate run of cytochrome C. RT of three chosen peptides.

|              | Peptides <i>m/z</i> |             |             |
|--------------|---------------------|-------------|-------------|
|              | 792.88              | 728.83      | 1005.48     |
| Replicate 1  | 13.68 min           | 13.90 min   | 18.16 min   |
| Replicate 2  | 13.62 min           | 13.80 min   | 18.00 min   |
| Replicate 3  | 13.68 min           | 13.87 min   | 18.08 min   |
| Average      | 13.66 min           | 13.86 min   | 18.08 min   |
| STDEV        | 0.03 min            | 0.05 min    | 0.08 min    |
| <b>RSD %</b> | <b>0.25</b>         | <b>0.37</b> | <b>0.44</b> |

## Figures

```
1      11      21      31      41      51      61      71      81      91      101      111      121      131
1 MRCRELPLVL LALVLCIAPR GRAVPLPAGG CTVLTKHYPR GNRWAVGCLM GKKSTGESS VSEKSLKQQ LREYIRWEEA ARNLLGLIER KENRNHQPPQ PKALCNQQPS WDSSESSNFK DVGSKGKVCGR LSAPGSQREG RNPQLNQQ
```

**Supplementary Figure S1:** Referring to Supplementary Table S1 reactor no #1. The sequence coverage from the new Protein Discoverer search (54.05 %, 6 unique peptides).

```
1      11      21      31      41      51      61      71      81      91      101      111      121      131
1 MRCRELPLVL LALVLCIAPR GRAVPLPAGG CTVLTKHYPR GNRWAVGCLM GKKSTGESS VSEKSLKQQ LREYIRWEEA ARNLLGLIER KENRNHQPPQ PKALCNQQPS WDSSESSNFK DVGSKGKVCGR LSAPGSQREG RNPQLNQQ
```

**Supplementary Figure S2:** Injection #2 of in-solution digested ProGRP isoform 1. The sequence coverage from the Protein Discoverer search (51.35 %, 9 unique peptides).

```
1      11      21      31      41      51      61      71      81      91
1 MCDVENGCKKI EVQKCAQCHT VEKCKKHTG PNLHGLFGRK TGQAPGESYT DANKNKGITW GEETLMEYLE NPKKYIPGTK MIFAGIKKKG EREDLIAYLK KATNE
```

**Supplementary Figure S3:** Reactor prepared 25.09.2012: TOT2\_040213\_29: 3 µg/ ml cytochrome C, sequence coverage of 88.57 %.

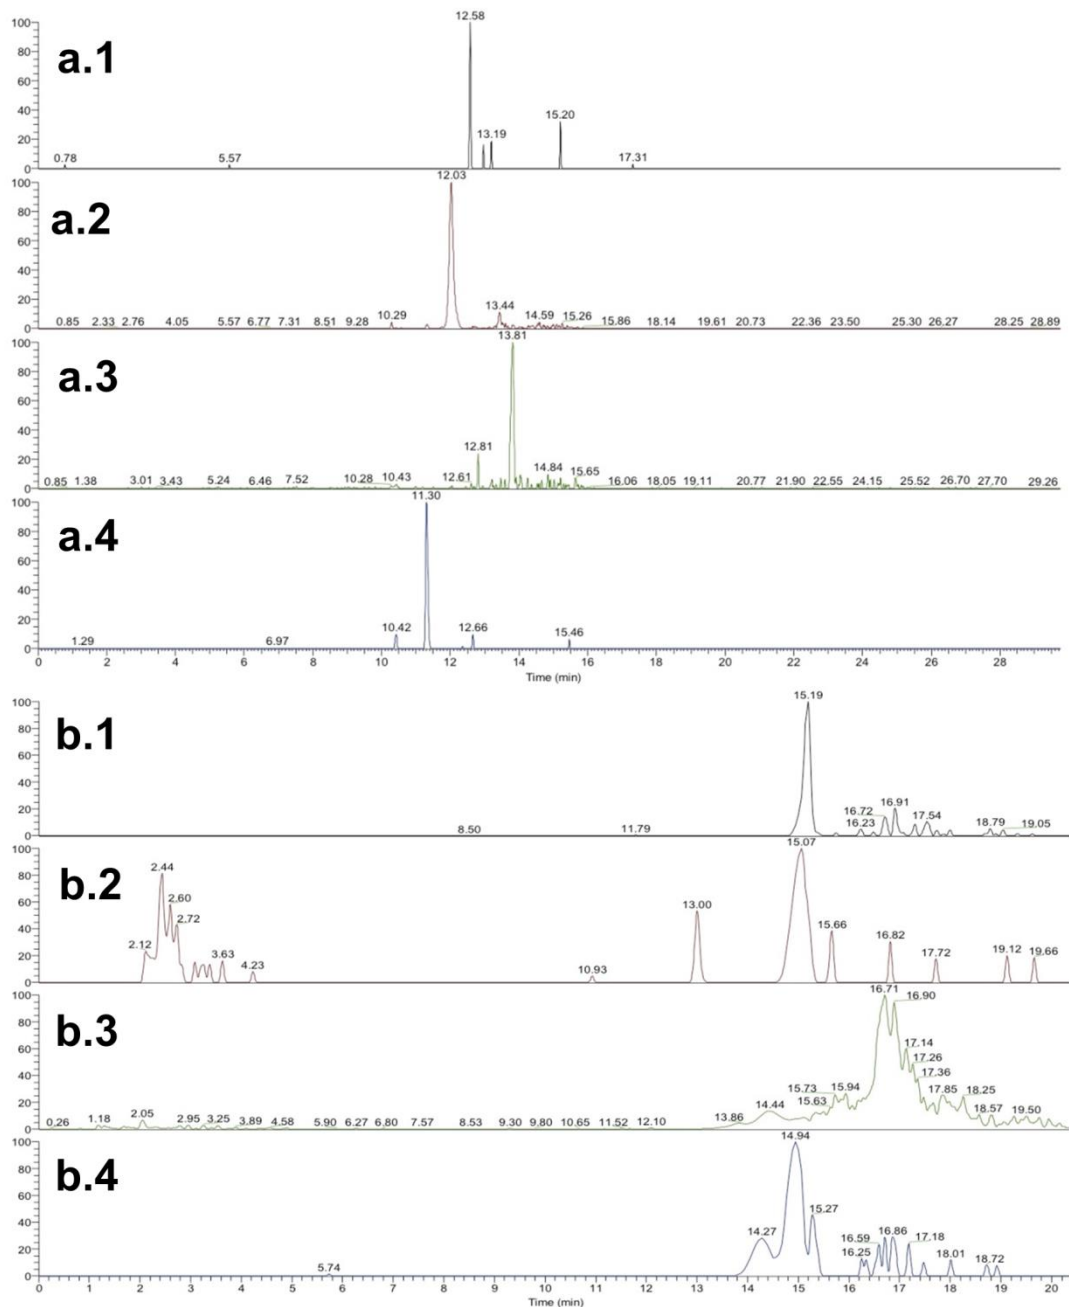

**Supplementary Figure S4: PLOT separation gives high resolution: a:** 5  $\mu\text{g/ml}$  cytochrome C protein digested on-line and peptides separated on a PS-DVB PLOT column (40 nL/min flow). **b:** The same sample amount digested on-line with trypsin reactor and SPE directly coupled to the mass spectrometer (300 nL/min flow). EIC of peptides: 1. represents  $m/z$  933.14<sup>3+</sup>, 2. represents  $m/z$  728.84<sup>2+</sup>, 3. represents  $m/z$  1013.48<sup>2+</sup> and 4. represents  $m/z$  1005.48<sup>2+</sup>.

| 1 | 11         | 21         | 31         | 41         | 51         | 61         | 71         | 81         | 91         | 101        | 111        | 121        | 131       |            |          |
|---|------------|------------|------------|------------|------------|------------|------------|------------|------------|------------|------------|------------|-----------|------------|----------|
| 1 |            |            |            |            | 0          |            |            |            |            |            |            |            |           |            |          |
| 1 | MRGRELPLVL | LALVLCIAPR | GRAVPLPAGC | CTVLTKHYPR | GNHWAVGHLM | GKKSTGESSS | VSERGSLKQQ | LREYIRWEEA | ARNLLGLIER | KENRNHQPPO | PKALGNQOPS | WSESDSSNFK | DVGSKGVGR | LSAPGSQREG | RNPQLNQQ |

**Supplementary Figure S5:** Referring to Supplementary Table S1 reactor no #2. The sequence coverage from the new Protein Discoverer search (40.54 %, 5 unique peptides).

| 1 | 11         | 21         | 31         | 41         | 51         | 61         | 71         | 81         | 91         | 101        | 111        | 121        | 131       |            |          |
|---|------------|------------|------------|------------|------------|------------|------------|------------|------------|------------|------------|------------|-----------|------------|----------|
| 1 |            |            |            |            | 0          |            |            |            |            |            |            |            |           |            |          |
| 1 | MRGRELPLVL | LALVLCIAPR | GRAVPLPAGC | CTVLTKHYPR | GNHWAVGHLM | GKKSTGESSS | VSERGSLKQQ | LREYIRWEEA | ARNLLGLIER | KENRNHQPPO | PKALGNQOPS | WSESDSSNFK | DVGSKGVGR | LSAPGSQREG | RNPQLNQQ |

**Supplementary Figure S6:** Referring to Supplementary Table S1 reactor no #3. The sequence coverage from the new Protein Discoverer search (40.54 %, 5 unique peptides).

| 1 | 11         | 21         | 31         | 41         | 51         | 61         | 71         | 81         | 91         | 101        | 111        | 121        | 131       |            |          |
|---|------------|------------|------------|------------|------------|------------|------------|------------|------------|------------|------------|------------|-----------|------------|----------|
| 1 |            |            |            |            | 0          |            |            |            |            |            |            |            |           |            |          |
| 1 | MRGRELPLVL | LALVLCIAPR | GRAVPLPAGC | CTVLTKHYPR | GNHWAVGHLM | GKKSTGESSS | VSERGSLKQQ | LREYIRWEEA | ARNLLGLIER | KENRNHQPPO | PKALGNQOPS | WSESDSSNFK | DVGSKGVGR | LSAPGSQREG | RNPQLNQQ |

**Supplementary Figure S7:** Referring to Supplementary Table S1 reactor no #4. The sequence coverage from the new Protein Discoverer search (54.05 %, 6 unique peptides).

| 1 | 11         | 21         | 31         | 41         | 51         | 61         | 71         | 81         | 91         | 101        | 111        | 121        | 131       |            |          |
|---|------------|------------|------------|------------|------------|------------|------------|------------|------------|------------|------------|------------|-----------|------------|----------|
| 1 |            |            |            |            | 0          |            |            |            |            |            |            |            |           |            |          |
| 1 | MRGRELPLVL | LALVLCIAPR | GRAVPLPAGC | CTVLTKHYPR | GNHWAVGHLM | GKKSTGESSS | VSERGSLKQQ | LREYIRWEEA | ARNLLGLIER | KENRNHQPPO | PKALGNQOPS | WSESDSSNFK | DVGSKGVGR | LSAPGSQREG | RNPQLNQQ |

**Supplementary Figure S8:** Referring to Supplementary Table S1 reactor no #5. The sequence coverage from the new Protein Discoverer search (40.54 %, 4 unique peptides).

| 1 | 11         | 21         | 31         | 41         | 51         | 61         | 71         | 81         | 91         | 101        | 111        | 121        | 131       |            |          |
|---|------------|------------|------------|------------|------------|------------|------------|------------|------------|------------|------------|------------|-----------|------------|----------|
| 1 |            |            |            |            | 0          |            |            |            |            |            |            |            |           |            |          |
| 1 | MRGRELPLVL | LALVLCIAPR | GRAVPLPAGC | CTVLTKHYPR | GNHWAVGHLM | GKKSTGESSS | VSERGSLKQQ | LREYIRWEEA | ARNLLGLIER | KENRNHQPPO | PKALGNQOPS | WSESDSSNFK | DVGSKGVGR | LSAPGSQREG | RNPQLNQQ |

**Supplementary Figure S9:** Injection #1 of in-solution digested ProGRP isoform 1. The sequence coverage from the Protein Discoverer search (45.29 %, 5 unique peptides).

| 1 | 11         | 21         | 31         | 41         | 51         | 61         | 71         | 81         | 91         | 101        | 111        | 121        | 131       |            |          |
|---|------------|------------|------------|------------|------------|------------|------------|------------|------------|------------|------------|------------|-----------|------------|----------|
| 1 |            |            |            |            | 0          |            |            |            |            |            |            |            |           |            |          |
| 1 | MRGRELPLVL | LALVLCIAPR | GRAVPLPAGC | CTVLTKHYPR | GNHWAVGHLM | GKKSTGESSS | VSERGSLKQQ | LREYIRWEEA | ARNLLGLIER | KENRNHQPPO | PKALGNQOPS | WSESDSSNFK | DVGSKGVGR | LSAPGSQREG | RNPQLNQQ |

**Supplementary Figure S10:** Injection #3 of in-solution digested ProGRP isoform 1. The sequence coverage from the Protein Discoverer search (45.95 %, 7 unique peptides).

| 1 | 11         | 21         | 31         | 41         | 51         | 61         | 71         | 81         | 91         | 101        | 111        | 121        | 131       |            |          |
|---|------------|------------|------------|------------|------------|------------|------------|------------|------------|------------|------------|------------|-----------|------------|----------|
| 1 |            |            |            |            | 0          |            |            |            |            |            |            |            |           |            |          |
| 1 | MRGRELPLVL | LALVLCIAPR | GRAVPLPAGC | CTVLTKHYPR | GNHWAVGHLM | GKKSTGESSS | VSERGSLKQQ | LREYIRWEEA | ARNLLGLIER | KENRNHQPPO | PKALGNQOPS | WSESDSSNFK | DVGSKGVGR | LSAPGSQREG | RNPQLNQQ |

**Supplementary Figure S11:** Reactor #1 injection #1: 2/7-13 (ProGRP\_250613\_41): 10 µg/ml ProGRP, system without PLOT. The sequence coverage from the Protein Discoverer search (27.03 %, 4 unique peptides).

```

1      11      21      31      41      51      61      71      81      91      101      111      121      131
1      1      0
MDGRELPLVL LALVLCLAPR GRAVPLPAGG GTVLTHQYPR GNRHVAUGHLM GKRSTGESSS VSEKRSKQQ LREYIRWEER ARNLLGLIER KENRNHQPPQ PKALGNQPPS WDSKSSNFK DVGSRKGVGR LSAPGSOREG RNPQLNQQ

```

**Supplementary Figure S12:** Reactor #1 injection #10: 4/7-13 (ProGRP\_250613\_65): 5 µg/ml ProGRP, system without PLOT. The sequence coverage from the Protein Discoverer search (40.54 %, 5 unique peptides).

```

1      11      21      31      41      51      61      71      81      91      101      111      121      131
1      1      0
MDGRELPLVL LALVLCLAPR GRAVPLPAGG GTVLTHQYPR GNRHVAUGHLM GKRSTGESSS VSEKRSKQQ LREYIRWEER ARNLLGLIER KENRNHQPPQ PKALGNQPPS WDSKSSNFK DVGSRKGVGR LSAPGSOREG RNPQLNQQ

```

**Supplementary Figure S13:** Reactor #1 injection #15: 31/7-13 (TestFarm\_300713\_11): 5 µg/ml ProGRP, system without PLOT. The sequence coverage from the Protein Discoverer search (54.05 %, 7 unique peptides).

```

1      11      21      31      41      51      61      71      81      91      101      111      121      131
1      1      0
MDGRELPLVL LALVLCLAPR GRAVPLPAGG GTVLTHQYPR GNRHVAUGHLM GKRSTGESSS VSEKRSKQQ LREYIRWEER ARNLLGLIER KENRNHQPPQ PKALGNQPPS WDSKSSNFK DVGSRKGVGR LSAPGSOREG RNPQLNQQ

```

**Supplementary Figure S14:** Reactor #1 injection #25: 1/8-13 (TestFarm\_300713\_18): 5 µg/ml ProGRP, system with PLOT. The sequence coverage from the Protein Discoverer search (54.05 %, 6 unique peptides).

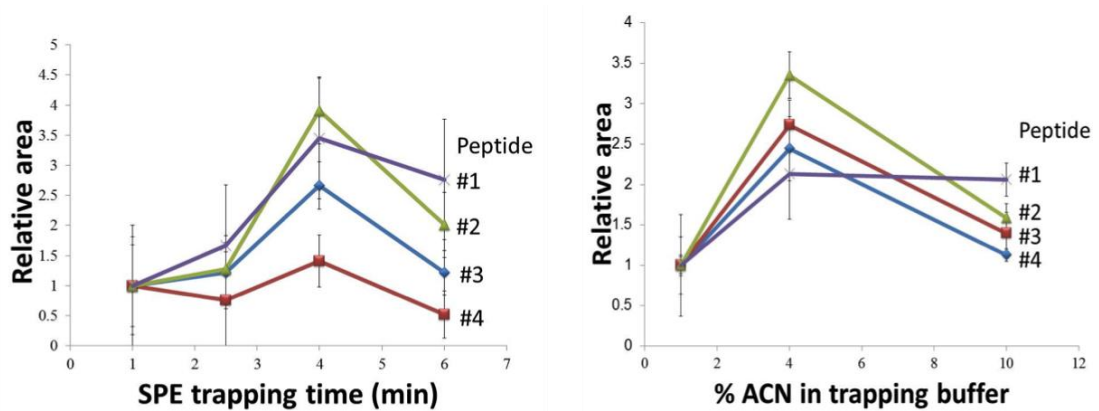

**Supplementary Figure S15: Optimizing trapping time and organic content of trapping mobile phase.** Left: Relative peptide area of 4 chosen peptides from in-solution digested myoglobin related to trapping time of the SPE. Right: Effect of relative area of the same peptides with percentage of organic content in the trapping buffer.

## Parameter Information 1

### Parameters from Proteome Discoverer Sequest HT search:

Created with Discoverer version: 1.4.0.288

=====  
=====

Number of filtered/unfiltered result items:

- 1/1 protein group(s)
- 1/1 merged protein(s)
- 8/8 peptide(s)
- 678/678 PSM(s)
- 6258/6258 search input(s)

=====  
=====

Peptide Grouping Options

- Show peptide groups: True
- Group peptides by: Mass and Sequence

Protein Grouping Options

- Enable protein grouping: True
- Consider leucine and isoleucine as equal: True
- Consider only PSMs with confidence at least: Medium
- Consider only PSMs with delta Cn better than: 0.15
- Apply strict maximum parsimony principle: True

No filters applied for data reduction

No result filters applied

=====  
=====

Summary of file D:\HKH\REVISED\TestFarm\_300713\_18.msf

Workflow created with Discoverer version: 1.4.0.288 (DBVersion:79)

=====  
=====

Search name: TestFarm\_300713\_18

Search description: -

Search date: 11/25/2013 09:51:53

=====  
=====

The pipeline tree:

-----

- |-(0) Spectrum Files
  - |-(1) Spectrum Selector
    - |-(2) Sequest HT
      - |-(3) Target Decoy PSM Validator



-----  
Processing node 0: Spectrum Files  
-----

Input Data:  
-----

File Name(s): D:\HKH\REVISED\TestFarm\_300713\_18.RAW  
-----

Processing node 1: Spectrum Selector  
-----

1. General Settings:  
-----

Precursor Selection: Use MS1 Precursor  
Use New Precursor Reevaluation: True

2. Spectrum Properties Filter:  
-----

Lower RT Limit: 0.002405  
Upper RT Limit: 25.0168866666667  
First Scan: 0  
Last Scan: 0  
Lowest Charge State: 0  
Highest Charge State: 0  
Min. Precursor Mass: 200 Da  
Max. Precursor Mass: 5000 Da  
Total Intensity Threshold: 0  
Minimum Peak Count: 1

3. Scan Event Filters:  
-----

MS Order: Is MS2  
Activation Type: Is CID  
Min. Collision Energy: 0  
Max. Collision Energy: 1000  
Scan Type: Is Full

4. Peak Filters:  
-----

S/N Threshold (FT-only): 1.5

5. Replacements for Unrecognized Properties:  
-----

Unrecognized Charge Replacements: Automatic  
Unrecognized Mass Analyzer Replacements: ITMS  
Unrecognized MS Order Replacements: MS2  
Unrecognized Activation Type Replacements: CID  
Unrecognized Polarity Replacements: +

6. Just for Testing:  
-----

Precursor Clipping Range Before: 2.5 Da  
Precursor Clipping Range After: 5.5 Da  
-----

Processing node 2: Sequest HT  
-----

1. Input Data:

-----  
Protein Database: ProGRP\_iso1.fasta  
Enzyme Name: Trypsin (Full)  
Max. Missed Cleavage Sites: 2  
Min. Peptide Length: 6  
Max. Peptide Length: 144

2. Scoring Options:

-----  
Max. Delta Cn: 0.05  
Max. Number of Peptides Reported: 10

3. Tolerances:

-----  
Precursor Mass Tolerance: 10 ppm  
Fragment Mass Tolerance: 0.6 Da  
Use Average Precursor Mass: False  
Use Average Fragment Mass: False

4. Spectrum Matching:

-----  
Use Neutral Loss a Ions: True  
Use Neutral Loss b Ions: True  
Use Neutral Loss y Ions: True  
Use Flanking Ions: True  
Weight of a Ions: 0  
Weight of b Ions: 1  
Weight of c Ions: 0  
Weight of x Ions: 0  
Weight of y Ions: 1  
Weight of z Ions: 0

5. Dynamic Modifications:

-----  
Max. Equal Modifications Per Peptide: 3  
Max. Dynamic Modifications Per Peptide: 4  
1. Dynamic Modification: Oxidation / +15.995 Da (M)

-----  
Processing node 3: Target Decoy PSM Validator  
-----

1. Decoy Database Search:

-----  
Target FDR (Strict): 0.01  
Target FDR (Relaxed): 0.05
